# Supplementary material for: Acquired Resistance and Clonal Evolution in Melanoma during BRAF Inhibitor Therapy
Source: Oxford University Press journal article supplement (doi:10.1158/2159-8290.cd-13-0642), 2013-11-21
Supplement: 21598290cd130642-sup-supp_table_s2.pdf [file 21598290cd130642-sup-supp_table_s2.pdf]

| Patient ID | Biopsy timing | BRAF# V600 | MAPK            |                 |                   |                        |                        |                    | PI3K-PTEN-AKT   |                    |                          |
|------------|---------------|------------|-----------------|-----------------|-------------------|------------------------|------------------------|--------------------|-----------------|--------------------|--------------------------|
|            |               |            | NRAS exons 1, 2 | KRAS exons 1, 2 | Mutant BRAF amp## | Mutant BRAF alt spl### | MEK1/ 2* Exons 2, 3, 6 | MAPK** whole-exome | AKT1 exons 3, 4 | AKT3*** exons 3, 4 | PI3K-AKT**** whole-exome |
| 1          | DP            | E          | -               | -               |                   |                        | -                      |                    | -               | -                  |                          |
| 2          | DP            | E          | -               | -               |                   |                        | -                      |                    | -               | -                  |                          |
| 3          | DP            | E          | -               | -               |                   |                        | -                      |                    | -               | -                  |                          |
| 4          | Baseline      | E          | -               | -               | -                 | -                      | -                      |                    | -               | -                  |                          |
|            | DP1           | E          | Q61K            | -               | -                 |                        | -                      |                    | -               | -                  |                          |
|            | DP2           | E          | Q61R            | -               | -                 |                        | -                      |                    | -               | -                  |                          |
|            | DP3           | E          | -               | -               | -                 | -                      | -                      |                    | -               | -                  |                          |
| 5          | Baseline      | E          | -               | -               | -                 |                        | -                      |                    | -               | -                  |                          |
|            | DP            | E          | -               | -               | -                 |                        | -                      |                    | -               | -                  |                          |
| 6          | DP            | E          | -               | -               |                   |                        | -                      |                    | -               | -                  |                          |
| 7          | DP            | E          | -               | -               |                   |                        | -                      |                    | -               | -                  |                          |
| 8          | DP            | E          | -               | -               | -                 |                        | -                      |                    | -               | -                  |                          |
| 9          | Baseline      | E          | -               | -               | -                 | -                      | -                      | -                  | -               | -                  | -                        |
|            | DP1           | E          | -               | -               | -                 | -                      | -                      | -                  | -               | -                  | -                        |
|            | DP2           | E          | -               | -               | -                 | -                      | -                      | -                  | -               | -                  | -                        |
|            | DP3           | E          | -               | -               | -                 | -                      | -                      | -                  | -               | -                  | -                        |
| 10         | DP            | E          | -               | -               | -                 | -                      | -                      |                    | -               | -                  |                          |
| 11         | Baseline      | E          | -               | -               | -                 | -                      | -                      | -                  | -               | -                  | -                        |
|            | DP1           | E          | -               | -               | AMP 2,6           | -                      | -                      | -                  | -               | -                  | -                        |
|            | DP2           | E          | -               | -               | AMP 2,6           | -                      | -                      | CDKN2A:DEL         | -               | -                  | PTEN:DEL                 |
| 12         | Baseline      | E          | -               | -               | -                 |                        | -                      |                    | -               | -                  |                          |
|            | DP            | E          | -               | -               | -                 |                        | -                      |                    | -               | -                  |                          |
| 13         | DP            | E          | -               | -               |                   |                        | -                      |                    | -               | -                  |                          |
| 14         | Baseline      | E          | -               | -               | -                 | -                      | -                      | -                  | -               | -                  | -                        |
|            | DP1           | E          | Q61K            | -               | -                 |                        | -                      |                    | -               | -                  | -                        |
|            | DP2           | E          | Q61R            | -               | -                 |                        | -                      |                    | -               | -                  | -                        |
| 15         | Baseline      | E          | -               | -               | -                 | -                      | -                      | -                  | -               | -                  | -                        |
|            | DP1           | E          | -               | -               | AMP 15,75         | -                      | -                      | -                  | -               | -                  | CREB3L2:AMP              |

|    |          |   |            |   |             |   |               |                          |       |   |                        |
|----|----------|---|------------|---|-------------|---|---------------|--------------------------|-------|---|------------------------|
|    | DP2      | E | Q61L/<br>R | - | AMP<br>2,10 |   | -             | -                        | -     | - | -                      |
| 16 | Baseline | K | -          | - | -           | - | -             | -                        | A102V | - | -                      |
|    | DP       | K | -          | - | -           | - | -             | CDKN2A:DEL<br>PRKACG:DEL | A102V | - | NOS3: S526F            |
| 17 | Baseline | E | -          | - | -           |   | -             | -                        | -     | - | -                      |
|    | DP       | E | G13R       | - | -           |   | -             | -                        | -     | - | -                      |
| 18 | Baseline | K | -          | - | -           |   | -             | -                        | -     | - | -                      |
|    | DP1      | K | -          | - | -           |   | -             | -                        | -     | - | -                      |
| 19 | Baseline | K | -          | - | -           |   | -             | -                        | -     | - | -                      |
|    | DP       | K | -          | - | -           |   | -             | -                        | -     | - | -                      |
| 20 | Baseline | E | -          | - | -           |   | -             | -                        | -     | - | -                      |
|    | DP       | E | -          | - | -           |   | -             | -                        | -     | - | -                      |
| 21 | DP       | E | G12D       | - | -           |   | -             | -                        | -     | - | -                      |
| 22 | Baseline | E | -          | - | -           |   | -             | -                        | -     | - | -                      |
|    | DP1      | E | -          | - | -           |   | MEK1<br>K57N  | -                        | -     | - | PHLPP1:<br>K596E       |
|    | DP2      | E | Q61R<br>■  | - | -           |   | -             | G12R ◆                   | -     | - | PHLPP1:<br>K596E       |
|    | DP3      | E | Q61R<br>■  | - | -           |   | -             | Q61H ◆                   | -     | - | -                      |
| 23 | Baseline | E | -          | - | -           |   | -             | -                        | -     | - | -                      |
|    | DP1      | E | -          | - | -           |   | -             | -                        | -     | - | PIK3CA:<br>D350G,E545G |
|    | DP2      | E | Q61K       | - | AMP<br>2;4  |   | -             | -                        | -     | - | -                      |
| 24 | Baseline | E | -          | - | -           |   | -             | -                        | -     | - | -                      |
|    | DP1      | E | -          | - | -           |   | Exons<br>2-8  | -                        | -     | - | PIK3R2<br>N561D        |
|    | DP2      | E | -          | - | -           |   | -             | -                        | -     | - | -                      |
|    | DP3      | E | -          | - | -           |   | -             | -                        | -     | - | -                      |
| 25 | Baseline | E | -          | - | -           |   | -             | -                        | -     | - | -                      |
|    | DP1      | E | -          | - | -           |   | -             | -                        | -     | - | -                      |
|    | DP2      | E | -          | - | -           |   | Exons<br>2-10 | -                        | -     | - | -                      |
| 26 | Baseline | K | -          | - | -           |   | -             | -                        | -     | - | -                      |
|    | DP1      | K | -          | - | -           |   | -             | -                        | -     | - | -                      |
|    | DP2      | K | -          | - | -           |   | Exons<br>2-10 | -                        | -     | - | -                      |
| 27 | Baseline | E | -          | - | -           |   | -             | -                        | -     | - | -                      |
|    | DP       | E | -          | - | AMP         |   | -             | -                        | -     | - | -                      |

|     |                      |   |      |      |             |               |   |                          |   |      |                                                     |
|-----|----------------------|---|------|------|-------------|---------------|---|--------------------------|---|------|-----------------------------------------------------|
| 28  | Baseline             | E | -    | -    | 3;6         | -             | - | -                        | - | -    | -                                                   |
|     | DP                   | E | Q61L | -    | -           | -             | - | -                        | - | -    | -                                                   |
| 29  | DP                   | E | -    | -    | -           | -             | - | -                        | - | -    | -                                                   |
| 30  | DP                   | E | -    | -    | -           | -             | - | -                        | - | -    | -                                                   |
| 31  | DP                   | K | -    | -    | -           | -             | - | -                        | - | -    | -                                                   |
| 32  | DP                   | E | -    | -    | -           | -             | - | -                        | - | -    | -                                                   |
| 33  | DP                   | E | -    | -    | -           | -             | - | -                        | - | -    | -                                                   |
| 34  | DP                   | E | -    | -    | -           | Exons<br>2-10 | - | -                        | - | -    | -                                                   |
| 35  | Baseline             | K | -    | -    | -           | -             | - | -                        | - | -    | -                                                   |
|     | DP                   | K | -    | -    | AMP<br>5;40 | -             | - | -                        | - | -    | CREB3L2:AMP<br>NOS3:AMP                             |
| 36  | Baseline             | E | -    | -    | -           | -             | - | -                        | - | -    | -                                                   |
|     | DP                   | E | -    | -    | -           | -             | - | -                        | - | -    | -                                                   |
| 37  | Baseline             | E | -    | -    | -           | -             | - | -                        | - | -    | -                                                   |
|     | DP1                  | E | -    | -    | AMP<br>5;15 | -             | - | -                        | - | -    | -                                                   |
|     | DP2                  | E | -    | G12C | -           | -             | - | LAMTOR3:DEL              | - | -    | IKBKB:AMP                                           |
|     | DP3<br>(LOH<br>rich) | E | -    | -    | AMP<br>6;18 | -             | - | DUSP4: DEL<br>PTPN5: DEL | - | -    | PTEN fs40<br>IKBKB:DEL<br>PPP2CB:DEL<br>PPP2R2A:DEL |
|     | DP4                  | E | -    | -    | -           | Exons<br>4-8  | - | -                        | - | -    | -                                                   |
|     | DP5                  | E | -    | G12C | -           | -             | - | -                        | - | -    | -                                                   |
|     | DP6                  | E | -    | G12C | -           | -             | - | -                        | - | -    | -                                                   |
|     | DP7                  | E | -    | -    | -           | Exons<br>2-10 | - | -                        | - | -    | -                                                   |
|     | DP8                  | E | -    | -    | -           | -             | - | -                        | - | -    | -                                                   |
| DP9 | E                    | - | -    | -    | -           | -             | - | -                        | - | -    |                                                     |
| 38  | Baseline             | E | -    | -    | -           | -             | - | -                        | - | -    | -                                                   |
|     | DP                   | E | G12R | -    | -           | -             | - | -                        | - | -    | PIK3CG<br>V983E                                     |
| 39  | Baseline             | E | -    | -    | -           | -             | - | -                        | - | -    | -                                                   |
|     | DP                   | E | -    | -    | -           | -             | - | -                        | - | -    | -                                                   |
| 40  | Baseline             | E | -    | -    | -           | -             | - | -                        | - | -    | -                                                   |
|     | DP1                  | E | -    | -    | AMP<br>8;16 | -             | - | -                        | - | -    | CREB3L2:AMP                                         |
|     | DP2<br>(CNV-         | E | -    | -    | -           | -             | - | CDKN2A:DEL<br>ATF4:AMP   |   | E17K | PTEN:DEL<br>AKT2:AMP                                |

|    |                       |   |      |   |            |   |   |                                                                                                                                                                                   |   |      |                                                                                                                       |
|----|-----------------------|---|------|---|------------|---|---|-----------------------------------------------------------------------------------------------------------------------------------------------------------------------------------|---|------|-----------------------------------------------------------------------------------------------------------------------|
|    | DP2<br>(CNV-<br>rich) | E | -    | - | -          | - | - | CDKN2A:DEL<br>ATF4:AMP<br>DUSP2: AMP<br>DUSP8: AMP<br>DUSP9: AMP<br>GNA12: AMP<br>HRAS: AMP<br>PRKCG: AMP<br>RASGRP2:AMP<br>RASGRP4:AMP<br>RPS6KA1:AMP<br>PLA2G4A:DEL<br>SOS1:DEL |   | E17K | PTEN:DEL<br>AKT2:AMP<br>BAD:AMP<br>CREB3L1:AMP<br>IKBKG:AMP<br>PPP2R1A:AMP<br>PPP2R5B:AMP<br>CDKN1B:DEL<br>PPP2CB:DEL |
| 41 | Baseline              | E | -    | - | -          |   | - |                                                                                                                                                                                   | - | -    |                                                                                                                       |
|    | DP                    | E | Q61R | - | -          |   | - |                                                                                                                                                                                   | - | -    |                                                                                                                       |
| 42 | DP1                   | K | -    | - |            | - | - |                                                                                                                                                                                   | - | -    |                                                                                                                       |
|    | DP2                   | K | -    | - |            | - | - |                                                                                                                                                                                   | - | -    |                                                                                                                       |
| 43 | Baseline              | E | -    | - | -          | - | - | -                                                                                                                                                                                 | - | -    | -                                                                                                                     |
|    | DP1                   | E | -    | - | AMP<br>2;4 | - | - | -                                                                                                                                                                                 | - | -    | PTEN<br>M134-                                                                                                         |
|    | DP2                   | E | -    | - | -          | - | - | MEK1 C121S<br>CDKN2A:DEL                                                                                                                                                          | - | -    | PTEN<br>M134-                                                                                                         |
| 44 | Baseline              | K | -    | - | -          | - | - | -                                                                                                                                                                                 | - | -    | -                                                                                                                     |
|    | DP1                   | K | -    | - | -          | - | - | -                                                                                                                                                                                 | - | -    | -                                                                                                                     |
|    | DP2                   | K | -    | - | -          | - | - | -                                                                                                                                                                                 | - | -    | -                                                                                                                     |

**Supplementary Table S2.** Summary of mechanisms of acquired BRAF inhibitor resistance in patient-derived tumor biopsies.

Patient ID text in blue denotes patients from whom normal tissue, baseline melanoma(s) and DP melanoma(s) had whole-exome sequence data.

– , event not observed.

Text in red denotes mechanisms of resistance previously known or functionally validated in this study. Box in grey, data not available.

Box in yellow, denotes DP tumor samples with an unknown mechanism(s).

# 76% (54 out of 71) of all disease progression (DP) tumors were analyzed for <sup>V600E/K</sup>BRAF secondary mutations by deep sequencing.

## Mutant *BRAF* amplification (amp) shown as fold increase (relative to baseline) and copy number in DP.

### Mutant *BRAF* alternative splicing (alt spl) shown as indicated loss of corresponding exons in truncated RNA.

\* *MEK1/2* mutations preexisting in the baseline tumors without evidence of enrichment in patient-matched DP tumors were not noted.

\*\* Genetic alterations in the MAPK pathway. Gene set of (classical) MAPK pathway includes the genes directly interacting with the RAS, RAF, MEK and ERK genes in the KEGG's MAPK signaling pathway (KEGG ID: hsa04151). DP-specific mutations in blue were not validated. Those MAPK alterations already pre-screened (for known mechanisms) and detected were not re-listed again.

\*\*\* *AKT3* copy number analyzed by gDNA Q-PCR and no copy number gain was noted in any DP tumor with respect to the baseline tumor, when available.

\*\*\*\* Genetic alterations in the PI3K-AKT pathway. PI3K-AKT pathway includes genes directly interacting with PI3K, PTEN and AKT in KEGG's PI3K-AKT signaling pathway (KEGG ID: hsa04151). *RAF1* (*CRAF*) is excluded as it is one of the MAPK signaling pathway's genes. DP-specific mutations in blue were not validated.

AMP, amplification or copy number increase.

DEL, deletion or copy number decrease.

◆ Tumor portions for Sanger sequencing derived from distinct portions of the same DP tumors processed for WES, which did not detect NRAS mutations.

■ Tumor portions for WES derived from distinct portions of the same DP tumors processed for initially for Sanger sequencing to detect known mechanisms.
